# Supplementary material for: Methylomic profiling of cortex samples from completed suicide cases implicates a role for PSORS1C3 in major depression and suicide
Source: PubMed Central journal article supplement (PMC5545719; doi:10.1038/tp.2016.249), 2017-01-03

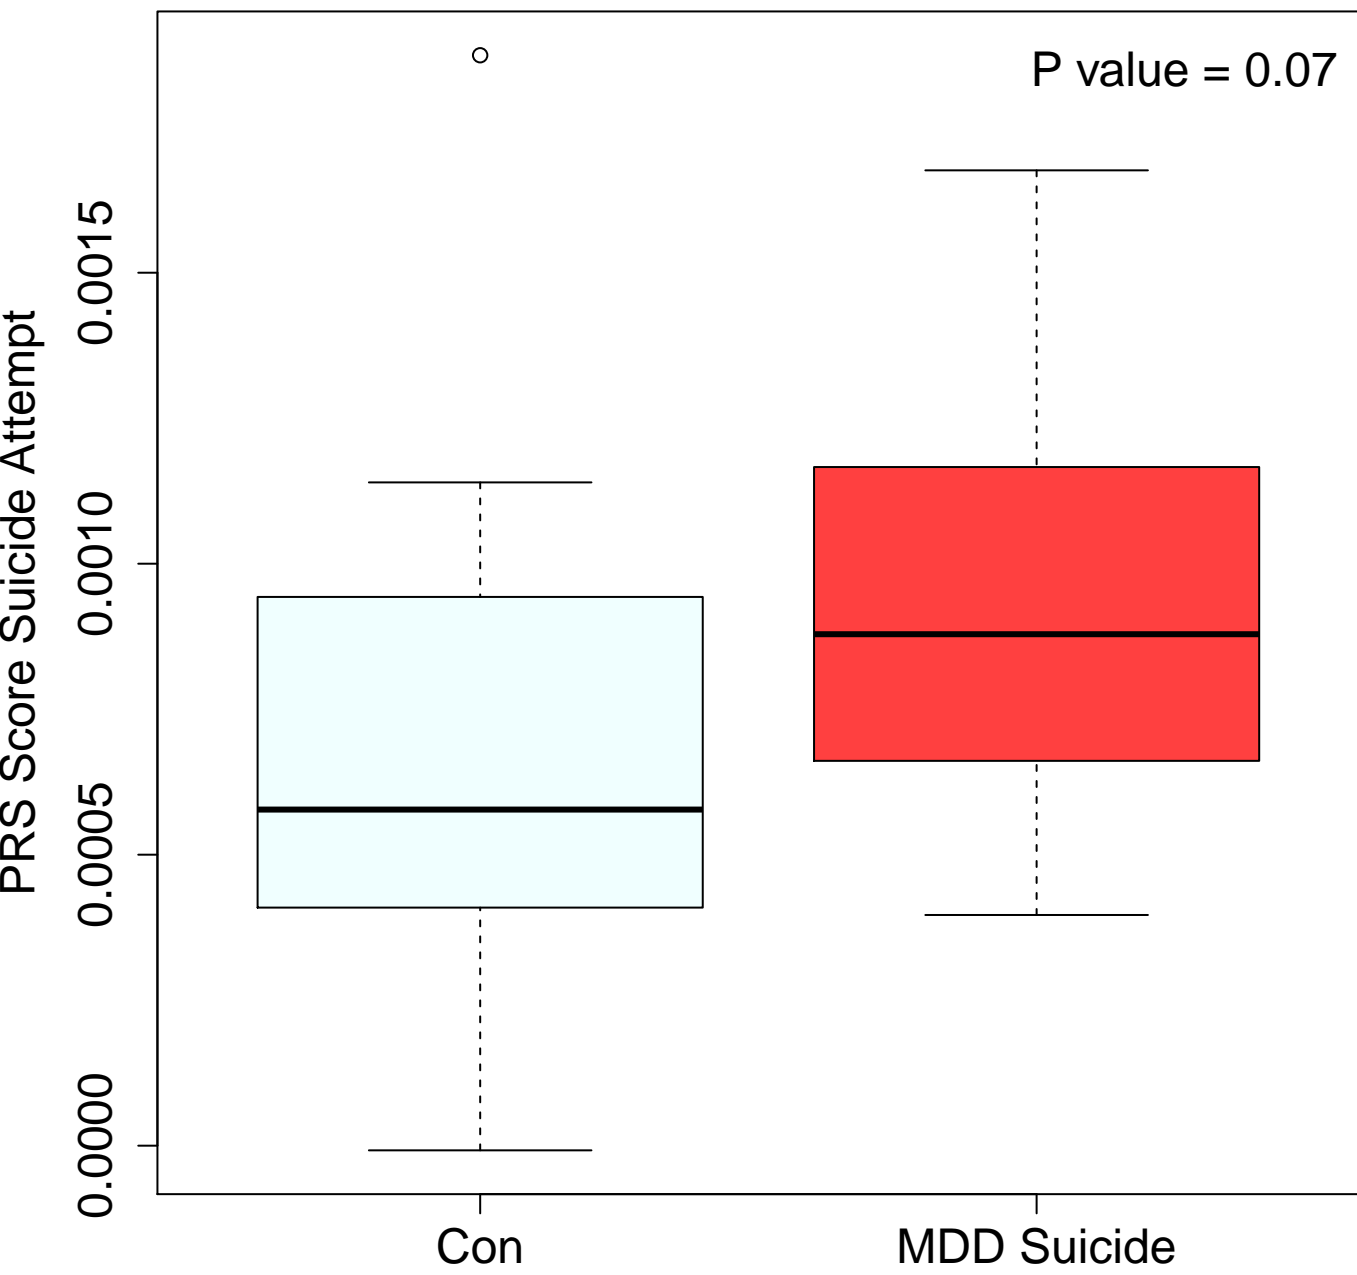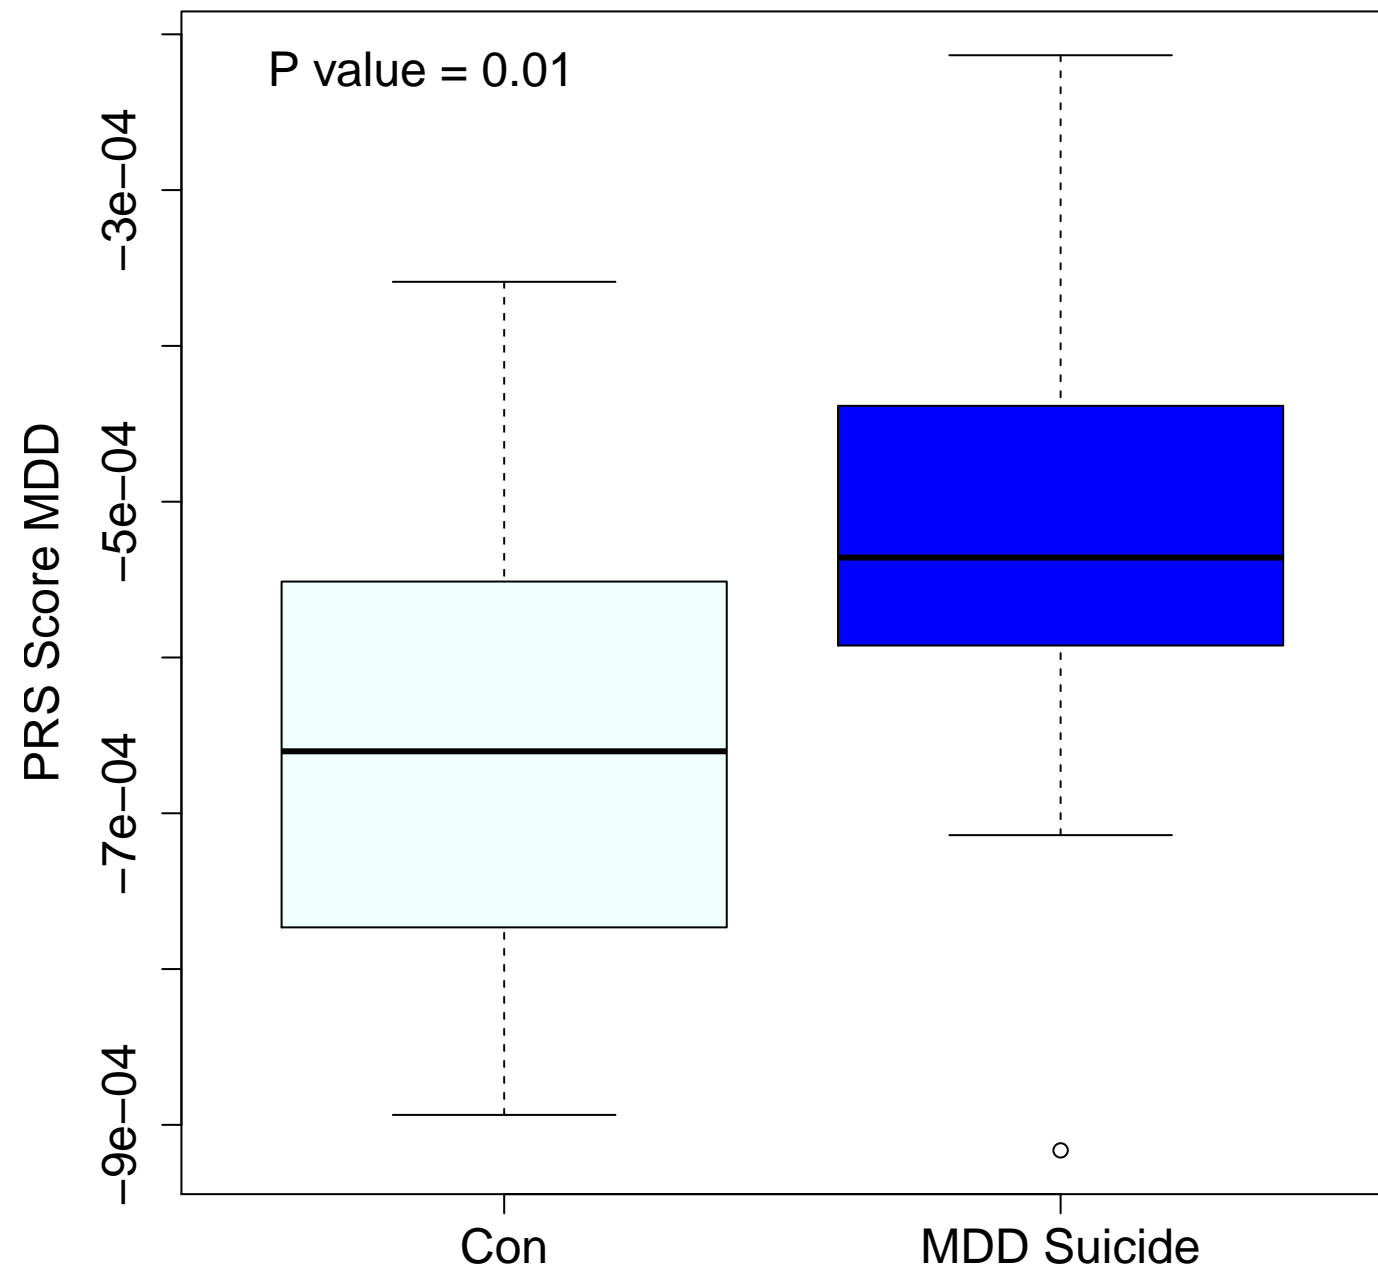

Supplement: tp2016249x2.pdf [file tp2016249x2.pdf]
